# Supplementary material
Source: publisher site journal article supplement (https://www.dovepress.com/article/593804)
Supplement: Supplementary file 1 [file 593804%20Revised%20Supplementary%20Materials.pdf]

Supplementary Table 1 Formulae for Anthropometric Indices

| Anthropometric Index | Formula                                                                                                                                                                                                                                                                                                                             | Note                                                                                  |
|----------------------|-------------------------------------------------------------------------------------------------------------------------------------------------------------------------------------------------------------------------------------------------------------------------------------------------------------------------------------|---------------------------------------------------------------------------------------|
| BMI                  | $= \frac{\text{Weight(kg)}}{\text{Height(m)}^2}$                                                                                                                                                                                                                                                                                    |                                                                                       |
| LAP                  | <p>Males: = [WC (cm) - 65] × TG (mmol/L),</p> <p>Females: = [WC (cm) - 58] × TG (mmol/L).</p>                                                                                                                                                                                                                                       | <p>WC adjustment:</p> <p>Male WC ≤ 65 cm → 66 cm</p> <p>Female WC ≤ 58 cm → 59 cm</p> |
| VAI                  | <p>Males: = <math>\frac{\text{WC(cm)}}{39.68+(1.88 \times \text{BMI})} \times \frac{\text{TG(mmol/L)}}{1.03} \times \frac{1.31}{\text{HDL-C(mmol/L)}}</math></p> <p>Females: = <math>\frac{\text{WC(cm)}}{36.58+(1.89 \times \text{BMI})} \times \frac{\text{TG(mmol/L)}}{0.81} \times \frac{1.52}{\text{HDL-C(mmol/L)}}</math></p> |                                                                                       |
| ABSI                 | $= \frac{\text{WC(cm)}}{\text{Height(m)}^{1/2} \times \text{BMI}^{2/3}}$                                                                                                                                                                                                                                                            |                                                                                       |
| BAI                  | $= \frac{\text{HC(cm)}}{\text{Height(m)}^{1.5}} - 18$                                                                                                                                                                                                                                                                               |                                                                                       |
| BRI                  | $= 364.2 - 365.5 \sqrt{1 - \frac{\text{WC(m)}/(2\pi)^2}{[0.5 \times \text{Height(m)}]^2}}$                                                                                                                                                                                                                                          |                                                                                       |
| RFM                  | <p>Males: = <math>64 - 20 \times \frac{\text{Height(cm)}}{\text{WC(cm)}}</math></p> <p>Females: = <math>76 - 20 \times \frac{\text{Height(cm)}}{\text{WC(cm)}}</math></p>                                                                                                                                                           |                                                                                       |

| Anthropometric Index | Formula                                                                                                                                                         | Note                                                          |
|----------------------|-----------------------------------------------------------------------------------------------------------------------------------------------------------------|---------------------------------------------------------------|
| UHR                  | $= \frac{UA \text{ (mg/dL)}}{HDL-C \text{ (mg/dL)}} \times 100$                                                                                                 |                                                               |
| TyG                  | $= \text{Ln} \frac{TG \text{ (mg/dl)} \times FPG \text{ (mg/dl)}}{2}$                                                                                           |                                                               |
| CMI                  | $= \frac{TG \text{ (mmol/L)}}{HDL-C \text{ (mmol/L)}} \times \frac{WC \text{ (cm)}}{\text{Height (cm)}}$                                                        |                                                               |
|                      | Males: = -267.93+0.68×Age(years)+0.03×BMI (kg/m <sup>2</sup> ) +4× WC (cm)+22×                                                                                  |                                                               |
| CVAI                 | LgTG (mmol/L)-16.32×HDL-C(mmol/L),<br>Females: = -187.32+1.71×Age(years)+4.32×BMI (kg/m <sup>2</sup> ) +1.12×WC<br>(cm)+39.76×LgTG(mmol/L)-11.66×HDL-C(mmol/L). | Negative values set to 0 ("extremely low visceral adiposity") |

- 2 Notes: Unit conversions used WHO coefficients: TG 1 mmol/L = 88.57 mg/dL, glucose 1 mmol/L = 18 mg/dL.
- 3 Abbreviations: BMI, Body Mass Index; WC, Waist Circumference; FPG, Fasting Plasma Glucose; TG, Triglycerides; HDL-C, High-Density
- 4 Lipoprotein Cholesterol; CVAI, Chinese Visceral Adiposity Index; CMI, Cardiometabolic Index; TyG, Triglyceride-Glucose Index; UA, Uric Acid;
- 5 UHR, Uric Acid to HDL-C Ratio; RFM, Relative Fat Mass; BRI, Body Roundness Index; BAI, Body Adiposity Index; ABSI, A Body Shape Index;
- 6 VAI, Visceral Adiposity Index; LAP, Lipid Accumulation Product; WHO, World Health Organization.

Supplementary Table 2 Paired comparison of AUCs for 12 anthropometric indices in predicting MetS (DeLong test) by sex

| Comparison   | Male              |                |                 |        |          | Female            |                |                 |        |          |
|--------------|-------------------|----------------|-----------------|--------|----------|-------------------|----------------|-----------------|--------|----------|
|              | Difference of AUC | Standard error | 95% CI          | Z      | <i>p</i> | Difference of AUC | Standard error | 95% CI          | Z      | <i>p</i> |
| BMI vs. WC   | -0.015            | 0.253          | -0.080 ~ 0.049  | -0.473 | 0.636    | 0.014             | 0.225          | -0.038 ~ 0.065  | 0.514  | 0.607    |
| BMI vs. LAP  | -0.114            | 0.251          | -0.181 ~ -0.048 | -3.365 | 0.001    | -0.119            | 0.219          | -0.176 ~ -0.062 | -4.099 | <0.001   |
| BMI vs. VAI  | -0.162            | 0.244          | -0.240 ~ -0.083 | -4.041 | <0.001   | -0.157            | 0.215          | -0.225 ~ -0.089 | -4.502 | <0.001   |
| BMI vs. ABSI | 0.060             | 0.253          | -0.038 ~ 0.158  | 1.197  | 0.231    | 0.064             | 0.226          | -0.011 ~ 0.139  | 1.679  | 0.093    |
| BMI vs. BAI  | 0.045             | 0.252          | -0.021 ~ 0.111  | 1.341  | 0.180    | 0.015             | 0.224          | -0.036 ~ 0.066  | 0.586  | 0.558    |
| BMI vs. BRI  | 0.002             | 0.248          | -0.061 ~ 0.064  | 0.049  | 0.961    | 0.012             | 0.226          | -0.040 ~ 0.065  | 0.453  | 0.650    |
| BMI vs. RFM  | -0.022            | 0.249          | -0.082 ~ 0.038  | -0.713 | 0.476    | 0.011             | 0.226          | -0.041 ~ 0.062  | 0.412  | 0.680    |
| BMI vs. UHR  | 0.030             | 0.255          | -0.056 ~ 0.116  | 0.676  | 0.499    | 0.021             | 0.225          | -0.053 ~ 0.096  | 0.562  | 0.574    |
| BMI vs. TyG  | -0.215            | 0.238          | -0.289 ~ -0.141 | -5.704 | <0.001   | -0.195            | 0.212          | -0.260 ~ -0.130 | -5.859 | <0.001   |

| Comparison   | Male       |          |                 |        |        | Female     |          |                 |        |        |
|--------------|------------|----------|-----------------|--------|--------|------------|----------|-----------------|--------|--------|
|              | Difference | Standard | 95% CI          | Z      | p      | Difference | Standard | 95% CI          | Z      | p      |
|              | of AUC     | error    |                 |        |        | of AUC     | error    |                 |        |        |
| BMI vs. CMI  | -0.166     | 0.243    | -0.241 ~ -0.091 | -4.335 | <0.001 | -0.166     | 0.214    | -0.231 ~ -0.102 | -5.061 | <0.001 |
| BMI vs. CVAI | -0.065     | 0.250    | -0.133 ~ 0.003  | -1.881 | 0.060  | -0.129     | 0.217    | -0.174 ~ -0.084 | -5.637 | <0.001 |
| WC vs. LAP   | -0.099     | 0.245    | -0.128 ~ -0.070 | -6.687 | <0.001 | -0.133     | 0.219    | -0.167 ~ -0.098 | -7.504 | <0.001 |
| WC vs. VAI   | -0.146     | 0.239    | -0.214 ~ -0.078 | -4.198 | <0.001 | -0.171     | 0.216    | -0.236 ~ -0.105 | -5.131 | <0.001 |
| WC vs. ABSI  | 0.075      | 0.246    | 0.023 ~ 0.128   | 2.811  | 0.005  | 0.051      | 0.224    | 0.014 ~ 0.087   | 2.742  | 0.006  |
| WC vs. BAI   | 0.060      | 0.249    | -0.020 ~ 0.140  | 1.482  | 0.138  | 0.002      | 0.225    | -0.043 ~ 0.046  | 0.077  | 0.938  |
| WC vs. BRI   | 0.017      | 0.244    | -0.036 ~ 0.070  | 0.632  | 0.528  | -0.001     | 0.226    | -0.034 ~ 0.031  | -0.085 | 0.933  |
| WC vs. RFM   | -0.006     | 0.244    | -0.036 ~ 0.023  | -0.416 | 0.678  | -0.003     | 0.226    | -0.021 ~ 0.015  | -0.292 | 0.770  |
| WC vs. UHR   | 0.045      | 0.251    | -0.040 ~ 0.130  | 1.041  | 0.298  | 0.008      | 0.226    | -0.065 ~ 0.081  | 0.210  | 0.834  |
| WC vs. TyG   | -0.200     | 0.234    | -0.270 ~ -0.129 | -5.554 | <0.001 | -0.208     | 0.213    | -0.276 ~ -0.141 | -6.049 | <0.001 |

| Comparison   | Male       |          |                 |        |        | Female     |          |                 |        |        |
|--------------|------------|----------|-----------------|--------|--------|------------|----------|-----------------|--------|--------|
|              | Difference | Standard | 95% CI          | Z      | p      | Difference | Standard | 95% CI          | Z      | p      |
|              | of AUC     | error    |                 |        |        | of AUC     | error    |                 |        |        |
| WC vs. CMI   | -0.150     | 0.239    | -0.218 ~ -0.083 | -4.364 | <0.001 | -0.180     | 0.215    | -0.243 ~ -0.117 | -5.571 | <0.001 |
| WC vs. CVAI  | -0.050     | 0.244    | -0.070 ~ -0.029 | -4.680 | <0.001 | -0.143     | 0.219    | -0.192 ~ -0.093 | -5.681 | <0.001 |
| LAP vs. VAI  | -0.047     | 0.236    | -0.099 ~ 0.005  | -1.789 | 0.074  | -0.038     | 0.209    | -0.080 ~ 0.004  | -1.757 | 0.079  |
| LAP vs. ABSI | 0.174      | 0.244    | 0.117 ~ 0.232   | 5.951  | <0.001 | 0.183      | 0.219    | 0.139 ~ 0.227   | 8.197  | <0.001 |
| LAP vs. BAI  | 0.159      | 0.247    | 0.078 ~ 0.241   | 3.829  | <0.001 | 0.134      | 0.219    | 0.083 ~ 0.185   | 5.168  | <0.001 |
| LAP vs. BRI  | 0.116      | 0.242    | 0.057 ~ 0.175   | 3.873  | <0.001 | 0.131      | 0.221    | 0.088 ~ 0.175   | 5.931  | <0.001 |
| LAP vs. RFM  | 0.093      | 0.242    | 0.050 ~ 0.135   | 4.288  | <0.001 | 0.130      | 0.220    | 0.092 ~ 0.167   | 6.802  | <0.001 |
| LAP vs. UHR  | 0.144      | 0.249    | 0.063 ~ 0.226   | 3.467  | 0.001  | 0.140      | 0.219    | 0.077 ~ 0.203   | 4.367  | <0.001 |
| LAP vs. TyG  | -0.101     | 0.231    | -0.155 ~ -0.047 | -3.657 | <0.001 | -0.076     | 0.205    | -0.121 ~ -0.031 | -3.300 | 0.001  |
| LAP vs. CMI  | -0.052     | 0.235    | -0.103 ~ 0.000  | -1.976 | 0.048  | -0.047     | 0.208    | -0.088 ~ -0.007 | -2.280 | 0.023  |

| Comparison   | Male       |          |                 |        |        | Female     |          |                 |        |        |
|--------------|------------|----------|-----------------|--------|--------|------------|----------|-----------------|--------|--------|
|              | Difference | Standard | 95% CI          | Z      | p      | Difference | Standard | 95% CI          | Z      | p      |
|              | of AUC     | error    |                 |        |        | of AUC     | error    |                 |        |        |
| LAP vs. CVAI | 0.049      | 0.242    | 0.020 ~ 0.079   | 3.276  | 0.001  | -0.010     | 0.212    | -0.059 ~ 0.039  | -0.401 | 0.689  |
| VAI vs. ABSI | 0.221      | 0.237    | 0.150 ~ 0.293   | 6.096  | <0.001 | 0.221      | 0.215    | 0.158 ~ 0.284   | 6.891  | <0.001 |
| VAI vs. BAI  | 0.207      | 0.239    | 0.126 ~ 0.287   | 5.054  | <0.001 | 0.172      | 0.216    | 0.105 ~ 0.239   | 5.039  | <0.001 |
| VAI vs. BRI  | 0.163      | 0.235    | 0.090 ~ 0.237   | 4.343  | <0.001 | 0.169      | 0.218    | 0.102 ~ 0.236   | 4.946  | <0.001 |
| VAI vs. RFM  | 0.140      | 0.236    | 0.069 ~ 0.211   | 3.872  | <0.001 | 0.168      | 0.218    | 0.102 ~ 0.234   | 4.964  | <0.001 |
| VAI vs. UHR  | 0.191      | 0.240    | 0.130 ~ 0.253   | 6.073  | <0.001 | 0.178      | 0.214    | 0.129 ~ 0.228   | 7.090  | <0.001 |
| VAI vs. TyG  | -0.054     | 0.221    | -0.079 ~ -0.028 | -4.101 | <0.001 | -0.038     | 0.200    | -0.061 ~ -0.014 | -3.165 | 0.002  |
| VAI vs. CMI  | -0.004     | 0.226    | -0.010 ~ 0.001  | -1.490 | 0.136  | -0.009     | 0.202    | -0.016 ~ -0.003 | -2.785 | 0.005  |
| VAI vs. CVAI | 0.097      | 0.236    | 0.034 ~ 0.159   | 3.033  | 0.002  | 0.028      | 0.209    | -0.031 ~ 0.087  | 0.932  | 0.351  |
| ABSI vs. BAI | -0.015     | 0.247    | -0.099 ~ 0.070  | -0.345 | 0.730  | -0.049     | 0.225    | -0.102 ~ 0.005  | -1.783 | 0.075  |

| Comparison    | Male       |          |                 |        |        | Female     |          |                 |        |        |
|---------------|------------|----------|-----------------|--------|--------|------------|----------|-----------------|--------|--------|
|               | Difference | Standard | 95% CI          | Z      | p      | Difference | Standard | 95% CI          | Z      | p      |
|               | of AUC     | error    |                 |        |        | of AUC     | error    |                 |        |        |
| ABSI vs. BRI  | -0.058     | 0.242    | -0.121 ~ 0.004  | -1.832 | 0.067  | -0.052     | 0.226    | -0.094 ~ -0.010 | -2.417 | 0.016  |
| ABSI vs. RFM  | -0.082     | 0.242    | -0.135 ~ -0.028 | -3.009 | 0.003  | -0.053     | 0.225    | -0.090 ~ -0.016 | -2.830 | 0.005  |
| ABSI vs. UHR  | -0.030     | 0.249    | -0.115 ~ 0.055  | -0.695 | 0.487  | -0.043     | 0.225    | -0.114 ~ 0.029  | -1.171 | 0.241  |
| ABSI vs. TyG  | -0.275     | 0.232    | -0.350 ~ -0.201 | -7.247 | <0.001 | -0.259     | 0.212    | -0.325 ~ -0.193 | -7.671 | <0.001 |
| ABSI vs. CMI  | -0.226     | 0.236    | -0.298 ~ -0.153 | -6.113 | <0.001 | -0.230     | 0.215    | -0.293 ~ -0.168 | -7.185 | <0.001 |
| ABSI vs. CVAI | -0.125     | 0.242    | -0.173 ~ -0.076 | -5.052 | <0.001 | -0.193     | 0.219    | -0.252 ~ -0.134 | -6.364 | <0.001 |
| BAI vs. BRI   | -0.043     | 0.242    | -0.086 ~ -0.001 | -2.008 | 0.045  | -0.003     | 0.226    | -0.033 ~ 0.026  | -0.209 | 0.835  |
| BAI vs. RFM   | -0.067     | 0.244    | -0.127 ~ -0.007 | -2.181 | 0.029  | -0.004     | 0.226    | -0.039 ~ 0.030  | -0.253 | 0.800  |
| BAI vs. UHR   | -0.015     | 0.250    | -0.098 ~ 0.068  | -0.360 | 0.718  | 0.006      | 0.226    | -0.068 ~ 0.080  | 0.160  | 0.873  |
| BAI vs. TyG   | -0.260     | 0.234    | -0.338 ~ -0.183 | -6.567 | <0.001 | -0.210     | 0.213    | -0.276 ~ -0.144 | -6.265 | <0.001 |

| Comparison   | Male       |          |                 |        |        | Female     |          |                 |        |        |
|--------------|------------|----------|-----------------|--------|--------|------------|----------|-----------------|--------|--------|
|              | Difference | Standard | 95% CI          | Z      | p      | Difference | Standard | 95% CI          | Z      | p      |
|              | of AUC     | error    |                 |        |        | of AUC     | error    |                 |        |        |
| BAI vs. CMI  | -0.211     | 0.238    | -0.288 ~ -0.134 | -5.370 | <0.001 | -0.182     | 0.215    | -0.245 ~ -0.118 | -5.577 | <0.001 |
| BAI vs. CVAI | -0.110     | 0.246    | -0.187 ~ -0.033 | -2.805 | 0.005  | -0.144     | 0.219    | -0.197 ~ -0.092 | -5.403 | <0.001 |
| BRI vs. RFM  | -0.023     | 0.239    | -0.049 ~ 0.003  | -1.770 | 0.077  | -0.001     | 0.227    | -0.016 ~ 0.014  | -0.170 | 0.865  |
| BRI vs. UHR  | 0.028      | 0.247    | -0.053 ~ 0.109  | 0.680  | 0.496  | 0.009      | 0.227    | -0.066 ~ 0.084  | 0.240  | 0.811  |
| BRI vs. TyG  | -0.217     | 0.230    | -0.291 ~ -0.142 | -5.710 | <0.001 | -0.207     | 0.215    | -0.274 ~ -0.140 | -6.021 | <0.001 |
| BRI vs. CMI  | -0.168     | 0.235    | -0.239 ~ -0.096 | -4.621 | <0.001 | -0.179     | 0.217    | -0.242 ~ -0.115 | -5.472 | <0.001 |
| BRI vs. CVAI | -0.067     | 0.241    | -0.117 ~ -0.016 | -2.590 | 0.010  | -0.141     | 0.220    | -0.189 ~ -0.093 | -5.775 | <0.001 |
| RFM vs. UHR  | 0.052      | 0.248    | -0.030 ~ 0.133  | 1.237  | 0.216  | 0.011      | 0.227    | -0.064 ~ 0.085  | 0.277  | 0.782  |
| RFM vs. TyG  | -0.194     | 0.230    | -0.266 ~ -0.121 | -5.213 | <0.001 | -0.206     | 0.214    | -0.273 ~ -0.138 | -5.953 | <0.001 |
| RFM vs. CMI  | -0.144     | 0.235    | -0.213 ~ -0.075 | -4.098 | <0.001 | -0.177     | 0.217    | -0.241 ~ -0.114 | -5.455 | <0.001 |

| Comparison   | Male       |          |                 |        |        | Female     |          |                 |        |        |
|--------------|------------|----------|-----------------|--------|--------|------------|----------|-----------------|--------|--------|
|              | Difference | Standard | 95% CI          | Z      | p      | Difference | Standard | 95% CI          | Z      | p      |
|              | of AUC     | error    |                 |        |        | of AUC     | error    |                 |        |        |
| RFM vs. CVAI | -0.043     | 0.240    | -0.074 ~ -0.013 | -2.767 | 0.006  | -0.140     | 0.220    | -0.188 ~ -0.092 | -5.735 | <0.001 |
| UHR vs. TyG  | -0.245     | 0.235    | -0.313 ~ -0.177 | -7.056 | <0.001 | -0.216     | 0.211    | -0.272 ~ -0.161 | -7.634 | <0.001 |
| UHR vs. CMI  | -0.196     | 0.239    | -0.257 ~ -0.134 | -6.255 | <0.001 | -0.188     | 0.213    | -0.237 ~ -0.138 | -7.429 | <0.001 |
| UHR vs. CVAI | -0.095     | 0.248    | -0.174 ~ -0.016 | -2.351 | 0.019  | -0.150     | 0.218    | -0.217 ~ -0.084 | -4.445 | <0.001 |
| TyG vs. CMI  | 0.049      | 0.220    | 0.024 ~ 0.074   | 3.862  | <0.001 | 0.029      | 0.199    | 0.005 ~ 0.052   | 2.396  | 0.017  |
| TyG vs. CVAI | 0.150      | 0.230    | 0.084 ~ 0.217   | 4.416  | <0.001 | 0.066      | 0.205    | 0.008 ~ 0.123   | 2.246  | 0.025  |
| CMI vs. CVAI | 0.101      | 0.235    | 0.039 ~ 0.163   | 3.212  | 0.001  | 0.037      | 0.208    | -0.019 ~ 0.094  | 1.306  | 0.192  |

8 Abbreviations: AUC, area under the curve; MetS, metabolic syndrome; CI, confidence interval; BMI, Body Mass Index; WC, Waist

9 Circumference; CVAI, Chinese Visceral Adiposity Index; CMI, Cardiometabolic Index; TyG, Triglyceride-Glucose Index; UHR, Uric Acid to HDL-C

10 Ratio; RFM, Relative Fat Mass; BRI, Body Roundness Index; BAI, Body Adiposity Index; ABSI, A Body Shape Index; VAI, Visceral Adiposity

11 Index; LAP, Lipid Accumulation Product.

12

13 Supplementary Table 3 Odds ratios (95% confidence intervals) for anthropometric indices and MetS by sex.

| Variables | Gender | Model 1            |          | Model 2            |          | Model 3            |          |
|-----------|--------|--------------------|----------|--------------------|----------|--------------------|----------|
|           |        | OR (95%CI)         | <i>p</i> | OR (95%CI)         | <i>p</i> | OR (95%CI)         | <i>p</i> |
| BMI       | Male   | 1.226(1.123~1.339) | <0.001   | 1.224(1.121~1.337) | <0.001   | 1.230(1.124~1.346) | <0.001   |
|           | Female | 1.137(1.071~1.208) | <0.001   | 1.125(1.058~1.195) | <0.001   | 1.126(1.059~1.198) | <0.001   |
| WC        | Male   | 1.069(1.039~1.100) | <0.001   | 1.065(1.035~1.096) | <0.001   | 1.063(1.033~1.095) | <0.001   |
|           | Female | 1.043(1.022~1.064) | <0.001   | 1.040(1.020~1.061) | <0.001   | 1.038(1.017~1.060) | <0.001   |
| LAP       | Male   | 1.038(1.027~1.049) | <0.001   | 1.037(1.027~1.048) | <0.001   | 1.037(1.026~1.048) | <0.001   |
|           | Female | 1.032(1.023~1.041) | <0.001   | 1.034(1.025~1.043) | <0.001   | 1.033(1.024~1.042) | <0.001   |
| VAI       | Male   | 1.567(1.407~1.745) | <0.001   | 1.585(1.421~1.769) | <0.001   | 1.578(1.413~1.761) | <0.001   |
|           | Female | 1.283(1.202~1.369) | <0.001   | 1.312(1.225~1.404) | <0.001   | 1.308(1.222~1.400) | <0.001   |

| Variables | Gender | Model 1             |          | Model 2             |          | Model 3             |          |
|-----------|--------|---------------------|----------|---------------------|----------|---------------------|----------|
|           |        | OR (95%CI)          | <i>p</i> | OR (95%CI)          | <i>p</i> | OR (95%CI)          | <i>p</i> |
| ABSI      | Male   | 1.279(0.930~1.760)  | 0.131    | 1.168(0.839~1.627)  | 0.357    | 1.155(0.828~1.613)  | 0.396    |
|           | Female | 1.141(0.912~1.428)  | 0.249    | 1.109(0.887~1.387)  | 0.364    | 1.085(0.865~1.360)  | 0.481    |
| BAI       | Male   | 1.078(0.985~1.180)  | 0.101    | 1.055(0.962~1.158)  | 0.256    | 1.067(0.971~1.172)  | 0.180    |
|           | Female | 1.098(1.041~1.157)  | 0.001    | 1.090(1.033~1.150)  | 0.002    | 1.098(1.040~1.160)  | 0.001    |
| BRI       | Male   | 1.718(1.257~2.349)  | 0.001    | 1.592(1.148~2.206)  | 0.005    | 1.619(1.165~2.250)  | 0.004    |
|           | Female | 1.528(1.225~1.906)  | <0.001   | 1.414(1.128~1.773)  | 0.003    | 1.439(1.144~1.809)  | 0.002    |
| RFM       | Male   | 1.118(1.062~1.176)  | <0.001   | 1.107(1.051~1.167)  | <0.001   | 1.107(1.051~1.167)  | <0.001   |
|           | Female | 1.066(1.029~1.104)  | <0.001   | 1.056(1.019~1.095)  | 0.003    | 1.055(1.018~1.094)  | 0.004    |
| UHR       | Male   | 1.052(1.017~1.089)  | 0.003    | 1.055(1.020~1.092)  | 0.002    | 1.056(1.020~1.093)  | 0.002    |
|           | Female | 1.050(1.015~1.087)  | 0.005    | 1.053(1.017~1.091)  | 0.004    | 1.059(1.022~1.098)  | 0.002    |
| TyG       | Male   | 9.098(5.842~14.168) | <0.001   | 9.656(6.144~15.177) | <0.001   | 9.634(6.090~15.241) | <0.001   |

| Variables | Gender | Model 1            |          | Model 2            |          | Model 3            |          |
|-----------|--------|--------------------|----------|--------------------|----------|--------------------|----------|
|           |        | OR (95%CI)         | <i>p</i> | OR (95%CI)         | <i>p</i> | OR (95%CI)         | <i>p</i> |
|           | Female | 5.914(4.220~8.288) | <0.001   | 6.788(4.741~9.717) | <0.001   | 6.760(4.710~9.704) | <0.001   |
| CMI       | Male   | 3.149(2.398~4.135) | <0.001   | 3.221(2.445~4.243) | <0.001   | 3.189(2.418~4.207) | <0.001   |
|           | Female | 2.619(2.055~3.339) | <0.001   | 2.820(2.189~3.633) | <0.001   | 2.802(2.172~3.615) | <0.001   |
| CVAI      | Male   | 1.021(1.014~1.027) | <0.001   | 1.021(1.013~1.028) | <0.001   | 1.020(1.013~1.028) | <0.001   |
|           | Female | 1.025(1.019~1.031) | <0.001   | 1.040(1.030~1.050) | <0.001   | 1.040(1.030~1.050) | <0.001   |

14 Model 1: unadjusted.

15 Model 2: adjusted for age.

16 Model 3: adjusted for age, smoking, alcohol consumption and physical activity.

17 Abbreviations: BMI, Body Mass Index; WC, Waist Circumference; CVAI, Chinese Visceral Adiposity Index; CMI, Cardiometabolic Index; TyG,

18 Triglyceride-Glucose Index; UHR, Uric Acid to HDL-C Ratio; RFM, Relative Fat Mass; BRI, Body Roundness Index; BAI, Body Adiposity Index;

19 ABSI, A Body Shape Index; VAI, Visceral Adiposity Index; LAP, Lipid Accumulation Product.

Supplementary Table 4 Odds ratios (95% confidence intervals) for anthropometric indices and elevated FPG by sex.

| Variables | Gender | Model 1            |          | Model 2            |          | Model 3            |          |
|-----------|--------|--------------------|----------|--------------------|----------|--------------------|----------|
|           |        | OR (95%CI)         | <i>p</i> | OR (95%CI)         | <i>p</i> | OR (95%CI)         | <i>p</i> |
| BMI       | Male   | 1.013(0.937~1.095) | 0.743    | 1.012(0.936~1.094) | 0.764    | 1.012(0.936~1.095) | 0.766    |
|           | Female | 1.075(1.016~1.137) | 0.012    | 1.064(1.005~1.126) | 0.034    | 1.062(1.002~1.124) | 0.042    |
| WC        | Male   | 1.024(0.999~1.049) | 0.056    | 1.017(0.993~1.043) | 0.169    | 1.017(0.993~1.043) | 0.172    |
|           | Female | 1.009(0.991~1.028) | 0.328    | 1.006(0.988~1.025) | 0.523    | 1.004(0.985~1.023) | 0.676    |
| LAP       | Male   | 1.008(1.000~1.016) | 0.039    | 1.007(0.999~1.016) | 0.067    | 1.007(0.999~1.015) | 0.077    |
|           | Female | 1.007(1.000~1.013) | 0.051    | 1.007(1.000~1.014) | 0.048    | 1.006(0.999~1.013) | 0.086    |
| VAI       | Male   | 1.067(0.981~1.160) | 0.129    | 1.071(0.984~1.166) | 0.113    | 1.069(0.982~1.164) | 0.123    |
|           | Female | 1.042(0.989~1.099) | 0.122    | 1.050(0.995~1.108) | 0.075    | 1.047(0.991~1.105) | 0.099    |
| ABSI      | Male   | 1.231(0.939~1.613) | 0.133    | 1.108(0.837~1.468) | 0.473    | 1.107(0.836~1.467) | 0.477    |
|           | Female | 0.904(0.735~1.110) | 0.335    | 0.877(0.712~1.080) | 0.218    | 0.864(0.700~1.067) | 0.174    |

| Variables | Gender | Model 1            |          | Model 2            |          | Model 3            |          |
|-----------|--------|--------------------|----------|--------------------|----------|--------------------|----------|
|           |        | OR (95%CI)         | <i>p</i> | OR (95%CI)         | <i>p</i> | OR (95%CI)         | <i>p</i> |
| BAI       | Male   | 0.979(0.901~1.064) | 0.618    | 0.949(0.869~1.035) | 0.237    | 0.949(0.869~1.036) | 0.241    |
|           | Female | 1.033(0.983~1.086) | 0.198    | 1.024(0.974~1.077) | 0.348    | 1.026(0.975~1.080) | 0.323    |
| BRI       | Male   | 1.057(0.806~1.386) | 0.689    | 0.918(0.688~1.224) | 0.559    | 0.919(0.689~1.226) | 0.565    |
|           | Female | 1.097(0.896~1.344) | 0.370    | 1.011(0.820~1.246) | 0.920    | 1.015(0.823~1.253) | 0.886    |
| RFM       | Male   | 1.025(0.984~1.067) | 0.241    | 1.007(0.966~1.051) | 0.734    | 1.008(0.966~1.051) | 0.727    |
|           | Female | 1.015(0.983~1.047) | 0.367    | 1.005(0.973~1.038) | 0.751    | 1.004(0.972~1.037) | 0.810    |
| UHR       | Male   | 1.002(0.972~1.033) | 0.896    | 1.005(0.974~1.036) | 0.754    | 1.005(0.975~1.037) | 0.746    |
|           | Female | 1.025(0.992~1.059) | 0.143    | 1.026(0.993~1.060) | 0.126    | 1.028(0.994~1.063) | 0.106    |
| CMI       | Male   | 1.173(0.956~1.440) | 0.127    | 1.178(0.957~1.449) | 0.122    | 1.173(0.953~1.445) | 0.131    |
|           | Female | 1.178(0.972~1.430) | 0.096    | 1.201(0.987~1.461) | 0.068    | 1.189(0.976~1.448) | 0.086    |
| CVAI      | Male   | 1.008(1.002~1.014) | 0.005    | 1.005(0.999~1.011) | 0.106    | 1.005(0.999~1.011) | 0.113    |

| Variables | Gender | Model 1            |          | Model 2            |          | Model 3            |          |
|-----------|--------|--------------------|----------|--------------------|----------|--------------------|----------|
|           |        | OR (95%CI)         | <i>p</i> | OR (95%CI)         | <i>p</i> | OR (95%CI)         | <i>p</i> |
|           | Female | 1.012(1.007~1.017) | <0.001   | 1.010(1.002~1.018) | 0.010    | 1.009(1.002~1.017) | 0.017    |

21 Model 1: unadjusted.

22 Model 2: adjusted for age.

23 Model 3: adjusted for age, smoking, alcohol consumption and physical activity..

24 Abbreviations: BMI, Body Mass Index; WC, Waist Circumference; CVAI, Chinese Visceral Adiposity Index; CMI, Cardiometabolic Index; TyG,

25 Triglyceride-Glucose Index; UHR, Uric Acid to HDL-C Ratio; RFM, Relative Fat Mass; BRI, Body Roundness Index; BAI, Body Adiposity Index;

26 ABSI, A Body Shape Index; VAI, Visceral Adiposity Index; LAP, Lipid Accumulation Product.

27

28

29

30

Supplementary Table 5 Odds ratios (95% confidence intervals) for anthropometric indices and elevated BP by sex.

| Variables | Gender | Model 1            |          | Model 2            |          | Model 3            |          |
|-----------|--------|--------------------|----------|--------------------|----------|--------------------|----------|
|           |        | OR (95%CI)         | <i>p</i> | OR (95%CI)         | <i>p</i> | OR (95%CI)         | <i>p</i> |
| BMI       | Male   | 1.170(1.079~1.268) | <0.001   | 1.173(1.080~1.274) | <0.001   | 1.175(1.081~1.278) | <0.001   |
|           | Female | 1.090(1.022~1.163) | 0.009    | 1.070(1.000~1.144) | 0.049    | 1.074(1.003~1.150) | 0.040    |
| WC        | Male   | 1.057(1.030~1.085) | <0.001   | 1.048(1.021~1.077) | <0.001   | 1.047(1.019~1.075) | 0.001    |
|           | Female | 1.062(1.039~1.086) | <0.001   | 1.060(1.036~1.084) | <0.001   | 1.058(1.034~1.083) | <0.001   |
| LAP       | Male   | 1.020(1.012~1.029) | <0.001   | 1.019(1.011~1.028) | <0.001   | 1.019(1.010~1.028) | <0.001   |
|           | Female | 1.010(1.002~1.017) | 0.010    | 1.011(1.003~1.018) | 0.006    | 1.009(1.002~1.017) | 0.018    |
| VAI       | Male   | 1.136(1.042~1.238) | 0.004    | 1.150(1.052~1.256) | 0.002    | 1.141(1.044~1.247) | 0.004    |
|           | Female | 0.956(0.891~1.025) | 0.203    | 0.964(0.897~1.036) | 0.324    | 0.960(0.892~1.033) | 0.272    |
| ABSI      | Male   | 1.383(1.035~1.848) | 0.029    | 1.162(0.857~1.575) | 0.334    | 1.146(0.842~1.559) | 0.386    |
|           | Female | 1.752(1.342~2.289) | <0.001   | 1.675(1.287~2.181) | <0.001   | 1.636(1.253~2.137) | <0.001   |

| Variables | Gender | Model 1            |          | Model 2            |          | Model 3            |          |
|-----------|--------|--------------------|----------|--------------------|----------|--------------------|----------|
|           |        | OR (95%CI)         | <i>p</i> | OR (95%CI)         | <i>p</i> | OR (95%CI)         | <i>p</i> |
| BAI       | Male   | 1.122(1.034~1.217) | 0.006    | 1.080(0.992~1.176) | 0.076    | 1.092(1.002~1.191) | 0.045    |
|           | Female | 1.134(1.071~1.201) | <0.001   | 1.128(1.062~1.197) | <0.001   | 1.142(1.074~1.214) | <0.001   |
| BRI       | Male   | 1.945(1.455~2.599) | <0.001   | 1.645(1.215~2.227) | 0.001    | 1.666(1.228~2.261) | 0.001    |
|           | Female | 1.944(1.516~2.491) | <0.001   | 1.740(1.346~2.250) | <0.001   | 1.804(1.388~2.344) | <0.001   |
| RFM       | Male   | 1.118(1.067~1.170) | <0.001   | 1.093(1.042~1.146) | <0.001   | 1.092(1.041~1.145) | <0.001   |
|           | Female | 1.113(1.069~1.160) | <0.001   | 1.101(1.056~1.148) | <0.001   | 1.102(1.056~1.150) | <0.001   |
| UHR       | Male   | 0.993(0.960~1.027) | 0.677    | 0.997(0.964~1.032) | 0.880    | 0.998(0.965~1.033) | 0.929    |
|           | Female | 0.940(0.899~0.982) | 0.006    | 0.936(0.894~0.981) | 0.005    | 0.941(0.897~0.987) | 0.012    |
| TyG       | Male   | 1.598(1.178~2.169) | 0.003    | 1.667(1.217~2.283) | 0.001    | 1.607(1.171~2.208) | 0.003    |
|           | Female | 0.888(0.658~1.197) | 0.435    | 0.879(0.641~1.204) | 0.421    | 0.832(0.602~1.151) | 0.266    |
| CMI       | Male   | 1.421(1.149~1.757) | 0.001    | 1.456(1.169~1.814) | 0.001    | 1.433(1.151~1.784) | 0.001    |

| Variables | Gender | Model 1            |          | Model 2            |          | Model 3            |          |
|-----------|--------|--------------------|----------|--------------------|----------|--------------------|----------|
|           |        | OR (95%CI)         | <i>p</i> | OR (95%CI)         | <i>p</i> | OR (95%CI)         | <i>p</i> |
|           | Female | 0.890(0.695~1.141) | 0.359    | 0.909(0.703~1.175) | 0.466    | 0.899(0.692~1.167) | 0.424    |
| CVAI      | Male   | 1.016(1.010~1.022) | <0.001   | 1.012(1.006~1.019) | <0.001   | 1.012(1.005~1.018) | <0.001   |
|           | Female | 1.021(1.015~1.027) | <0.001   | 1.013(1.004~1.023) | 0.004    | 1.013(1.004~1.022) | 0.007    |

32 Model 1: unadjusted.

33 Model 2: adjusted for age.

34 Model 3: adjusted for age, smoking, alcohol consumption and physical activity.

35 Abbreviations: BMI, Body Mass Index; WC, Waist Circumference; CVAI, Chinese Visceral Adiposity Index; CMI, Cardiometabolic Index; TyG,

36 Triglyceride-Glucose Index; UHR, Uric Acid to HDL-C Ratio; RFM, Relative Fat Mass; BRI, Body Roundness Index; BAI, Body Adiposity Index;

37 ABSI, A Body Shape Index; VAI, Visceral Adiposity Index; LAP, Lipid Accumulation Product.

38

39

Supplementary Table 6 Odds ratios (95% confidence intervals) for anthropometric indices and elevated TG by sex.

| Variables | Gender | Model 1            |          | Model 2            |          | Model 3            |          |
|-----------|--------|--------------------|----------|--------------------|----------|--------------------|----------|
|           |        | OR (95%CI)         | <i>p</i> | OR (95%CI)         | <i>p</i> | OR (95%CI)         | <i>p</i> |
| BMI       | Male   | 1.182(1.096~1.275) | <0.001   | 1.185(1.098~1.279) | <0.001   | 1.187(1.099~1.283) | <0.001   |
|           | Female | 1.026(0.970~1.085) | 0.363    | 1.032(0.976~1.092) | 0.268    | 1.033(0.975~1.093) | 0.270    |
| WC        | Male   | 1.054(1.030~1.079) | <0.001   | 1.062(1.036~1.088) | <0.001   | 1.060(1.034~1.087) | <0.001   |
|           | Female | 0.994(0.976~1.012) | 0.513    | 0.995(0.977~1.014) | 0.619    | 0.994(0.975~1.012) | 0.496    |
| ABSI      | Male   | 1.168(0.907~1.506) | 0.229    | 1.274(0.977~1.662) | 0.073    | 1.261(0.967~1.645) | 0.087    |
|           | Female | 0.864(0.703~1.061) | 0.163    | 0.873(0.709~1.074) | 0.198    | 0.860(0.698~1.059) | 0.156    |
| BAI       | Male   | 1.080(1.002~1.164) | 0.046    | 1.103(1.021~1.192) | 0.013    | 1.118(1.032~1.210) | 0.006    |
|           | Female | 0.981(0.933~1.032) | 0.457    | 0.985(0.937~1.036) | 0.558    | 0.988(0.939~1.039) | 0.634    |
| BRI       | Male   | 1.422(1.102~1.836) | 0.007    | 1.615(1.230~2.121) | 0.001    | 1.644(1.248~2.166) | <0.001   |
|           | Female | 0.950(0.775~1.164) | 0.621    | 0.984(0.800~1.211) | 0.883    | 0.996(0.808~1.226) | 0.967    |

| Variables | Gender | Model 1            |          | Model 2            |          | Model 3            |          |
|-----------|--------|--------------------|----------|--------------------|----------|--------------------|----------|
|           |        | OR (95%CI)         | <i>p</i> | OR (95%CI)         | <i>p</i> | OR (95%CI)         | <i>p</i> |
| RFM       | Male   | 1.072(1.031~1.114) | 0.001    | 1.091(1.047~1.137) | <0.001   | 1.091(1.047~1.137) | <0.001   |
|           | Female | 0.990(0.959~1.022) | 0.528    | 0.994(0.963~1.026) | 0.710    | 0.994(0.962~1.026) | 0.694    |
| UHR       | Male   | 1.045(1.015~1.076) | 0.003    | 1.044(1.013~1.075) | 0.004    | 1.046(1.015~1.077) | 0.003    |
|           | Female | 1.072(1.036~1.109) | <0.001   | 1.072(1.036~1.109) | <0.001   | 1.075(1.039~1.113) | <0.001   |

41 Model 1: unadjusted.

42 Model 2: adjusted for age.

43 Model 3: adjusted for age, smoking, alcohol consumption and physical activity.

44 Abbreviations: BMI, Body Mass Index; WC, Waist Circumference; CVAI, Chinese Visceral Adiposity Index; CMI, Cardiometabolic Index; TyG,

45 Triglyceride-Glucose Index; UHR, Uric Acid to HDL-C Ratio; RFM, Relative Fat Mass; BRI, Body Roundness Index; BAI, Body Adiposity Index;

46 ABSI, A Body Shape Index; VAI, Visceral Adiposity Index; LAP, Lipid Accumulation Product.

47

Supplementary Table 7 Odds ratios (95% confidence intervals) for anthropometric indices and reduced HDL-C by sex.

| Variables | Gender | Model 1            |          | Model 2            |          | Model 3            |          |
|-----------|--------|--------------------|----------|--------------------|----------|--------------------|----------|
|           |        | OR (95%CI)         | <i>p</i> | OR (95%CI)         | <i>p</i> | OR (95%CI)         | <i>p</i> |
| BMI       | Male   | 1.031(0.895~1.188) | 0.669    | 1.031(0.895~1.189) | 0.672    | 1.037(0.895~1.201) | 0.630    |
|           | Female | 0.951(0.852~1.061) | 0.365    | 0.942(0.843~1.053) | 0.294    | 0.943(0.844~1.053) | 0.297    |
| WC        | Male   | 0.989(0.949~1.031) | 0.615    | 0.987(0.947~1.030) | 0.551    | 0.994(0.952~1.038) | 0.785    |
|           | Female | 1.010(0.972~1.051) | 0.600    | 1.008(0.969~1.049) | 0.683    | 1.012(0.973~1.053) | 0.543    |
| LAP       | Male   | 0.984(0.974~0.994) | 0.002    | 0.984(0.974~0.994) | 0.002    | 0.984(0.973~0.995) | 0.003    |
|           | Female | 0.991(0.981~1.002) | 0.124    | 0.991(0.980~1.002) | 0.119    | 0.993(0.982~1.004) | 0.204    |
| VAI       | Male   | 0.946(0.825~1.086) | 0.432    | 0.947(0.825~1.086) | 0.434    | 0.967(0.837~1.117) | 0.647    |
|           | Female | 1.389(1.110~1.738) | 0.004    | 1.391(1.113~1.737) | 0.004    | 1.422(1.128~1.792) | 0.003    |
| ABSI      | Male   | 0.868(0.546~1.380) | 0.550    | 0.836(0.519~1.346) | 0.460    | 0.865(0.517~1.445) | 0.579    |
|           | Female | 1.413(0.934~2.138) | 0.102    | 1.409(0.922~2.153) | 0.113    | 1.454(0.953~2.218) | 0.083    |

| Variables | Gender | Model 1            |          | Model 2            |          | Model 3            |          |
|-----------|--------|--------------------|----------|--------------------|----------|--------------------|----------|
|           |        | OR (95%CI)         | <i>p</i> | OR (95%CI)         | <i>p</i> | OR (95%CI)         | <i>p</i> |
| BAI       | Male   | 1.120(0.943~1.332) | 0.197    | 1.117(0.937~1.331) | 0.218    | 1.099(0.915~1.320) | 0.313    |
|           | Female | 1.041(0.933~1.160) | 0.473    | 1.035(0.928~1.154) | 0.542    | 1.027(0.921~1.144) | 0.632    |
| BRI       | Male   | 1.148(0.705~1.870) | 0.579    | 1.122(0.675~1.865) | 0.658    | 1.117(0.661~1.887) | 0.680    |
|           | Female | 1.467(0.938~2.295) | 0.093    | 1.412(0.895~2.226) | 0.138    | 1.375(0.870~2.172) | 0.172    |
| RFM       | Male   | 0.994(0.926~1.066) | 0.867    | 0.989(0.920~1.064) | 0.766    | 0.995(0.924~1.071) | 0.885    |
|           | Female | 1.043(0.978~1.113) | 0.200    | 1.038(0.972~1.109) | 0.266    | 1.039(0.972~1.110) | 0.257    |
| TyG       | Male   | 0.116(0.065~0.208) | <0.001   | 0.115(0.064~0.207) | <0.001   | 0.123(0.067~0.225) | <0.001   |
|           | Female | 0.284(0.169~0.479) | <0.001   | 0.286(0.169~0.482) | <0.001   | 0.270(0.156~0.468) | <0.001   |

49 Model 1: unadjusted.

50 Model 2: adjusted for age.

51 Model 3: adjusted for age, smoking, alcohol consumption and physical activity.

- 52 Abbreviations: BMI, Body Mass Index; WC, Waist Circumference; CVAI, Chinese Visceral Adiposity Index; CMI, Cardiometabolic Index; TyG,
- 53 Triglyceride-Glucose Index; UHR, Uric Acid to HDL-C Ratio; RFM, Relative Fat Mass; BRI, Body Roundness Index; BAI, Body Adiposity Index;
- 54 ABSI, A Body Shape Index; VAI, Visceral Adiposity Index; LAP, Lipid Accumulation Product.
